1 Analysis of SARS-CoV-2 mutations associated with resistance to therapeutic monoclonal antibodies that  
2 emerge after treatment.

3

4 Daniele Focosi<sup>1,#</sup>

5 Scott McConnell<sup>2</sup>

6 David J. Sullivan<sup>2</sup>

7 Arturo Casadevall<sup>2</sup>

8

9 <sup>1</sup>North-Western Tuscany Blood Bank, Pisa University Hospital, Italy.

10 <sup>2</sup>Department of Molecular Microbiology and Immunology, Johns Hopkins Bloomberg School of Public  
11 Health, Baltimore, MD 21205, USA.

12

13 #corresponding author: [daniele.focosi@gmail.com](mailto:daniele.focosi@gmail.com).

14

15 **Word counts:** abstract: 235; body 1941.

16 **Keywords:** COVID-19; SARS-CoV-2; monoclonal antibodies; sotrovimab; casirivimab; imdevimab;  
17 tixagevimab; cilgavimab.

18 **Author contributions:** D.F. performed literature search and wrote the first draft. A.C. revised the  
19 manuscript. D.J.S. revised the manuscript and curated Table 3. S.M. designed Figure 2.

20 **Conflict of interest statement:** We declare we have no COI related to this manuscript.

21 **Funding:** none.

22

## 23 **Abstract**

24 The mutation rate of the Omicron sublineage has led to baseline resistance against all previously  
25 authorized anti-Spike monoclonal antibodies (mAbs). Nevertheless, in case more antiviral mAbs will be  
26 authorized in the future, it is relevant to understand how frequently treatment-emergent resistance has  
27 emerged so far, under different combinations and in different patient subgroups. We report the results  
28 of a systematic review of the medical literature for case reports and case series for treatment-emergent  
29 immune escape, which is defined as emergence of a resistance-driving mutation in at least 20% of  
30 sequences in a given host at a given timepoint. We identified 31 publications detailing 201 cases that  
31 included different variants of concern (VOC) and found that the incidence of treatment emergent-  
32 resistance ranged from 10% to 50%. Most of the treatment-emergent resistance events occurred in  
33 immunocompromised patients. Interestingly, resistance also emerged against cocktails of two mAbs,  
34 albeit at lower frequencies. The heterogenous therapeutic management of those cases doesn't allow

35 inferences about the clinical outcome in patients with treatment-emergent resistance. Furthermore, we  
36 noted a temporal correlation between the introduction of mAb therapies and a subsequent increase in  
37 SARS-CoV-2 sequences across the globe carrying mutations conferring resistance to that mAb, raising  
38 concern as to whether these had originated in mAb-treated individuals. Our findings confirm that  
39 treatment-emergent immune escape to anti-Spike mAbs represents a frequent and concerning  
40 phenomenon and suggests that these are associated with mAb use in immunosuppressed hosts.

## 41 Introduction

42 Passive antibody pre-exposure and post-exposure prophylaxis and treatments are much needed for  
43 immunocompromised patients at risk of COVID-19 progression. For them, anti-Spike monoclonal  
44 antibodies (mAb) have been the treatment of choice since early 2021. The biologicals were safe, well  
45 tolerated and efficient at preventing disease and reducing the likelihood of progression to severe  
46 disease. Unfortunately, the advent of the Omicron VOC progressively defeated the emergency use  
47 authorized mAbs, leaving all revoked by the US Food and Drug Administration at the time of writing. The  
48 COVID-19 pandemic has represented the first instance of large-scale deployments of passive  
49 immunotherapies against an infectious agent, and with persistence at epidemic levels and fluctuations  
50 in the dominant variants, it is possible that this scenario will persist for more years. This in turn provides  
51 a unique opportunity to study the phenomenon of emerging resistance to antibody-based therapeutics.  
52 The emergence of mAb-resistant variants after individualized therapy has potential public health  
53 implications if these viruses re-enter the general population and are able to evade vaccine or prior  
54 infection immunity by virtue of their mutations (Casadevall and Focosi, 2023) Here we analyzed mAbs  
55 resistance patterns following therapy principally in immunosuppressed but sometimes in  
56 immunocompetent COVID-19 patients.

## 57 Materials and methods

### 58 *Inferring baseline resistance to anti-Spike monoclonal antibodies.*

59 The Stanford University Coronavirus Antiviral & Resistance Database is a comprehensively curated  
60 collection of published data on the susceptibility of SARS-CoV-2 variants to anti-Spike mAbs and the  
61 plasma from previously infected and/or vaccinated persons. It also records the Spike protein mutations  
62 that are selected by mAbs and that emerge in persons experiencing prolonged infection (Tzou et al.,  
63 2020). It is publicly accessible at <https://covdb.stanford.edu/>. For each authorized anti-Spike mAb, we  
64 manually scanned mutations associated with >5-fold median reduction in neutralizing antibody (nAb)  
65 titers from primary research listed in search results provided at [https://covdb.stanford.edu/search-](https://covdb.stanford.edu/search-drdb/?form_only)  
66 [drdb/?form\\_only](https://covdb.stanford.edu/search-drdb/?form_only). The cutoff was arbitrarily chosen by the authors based on former literature suggesting  
67 loss of therapeutic efficacy.

### 68 *Literature search*

69 On February 1 2023, we searched PubMed, bioRxiv and medRxiv repositories for literature published  
70 since January 1 2020 to February 1 2023 using English language as a restriction. We used the query  
71 “(“sotrovimab” OR “tixagevimab” OR “cilgavimab” OR “bamlanivimab” OR “etesevimab” OR “casirivimab”  
72 OR “imdevimab” OR “bebtelovimab” OR “regdanvimab”) AND (“resistance” OR “escape” OR “evasion”  
73 OR “evolution”)”. The PRISMA flowchart is reported in Figure 1. We excluded all primary research on  
74 baseline (as opposed to treatment-emergent) resistance and all secondary research. We collected data  
75 about sample size, underlying immunosuppression and incidence of *de novo* mutations at Spike residues  
76 associated with mAb escape.

77

### 78 *Determining the temporal relationship between mAb authorization and global prevalence*

79 On February 1 2023 we searched CoV-Spectrum.org (Chen et al., 2021a) for worldwide prevalence of  
80 SARS-CoV-2 sublineages carrying either at least one mutation conferring resistance to a given mAb or  
81 just the major resistance associated mutations (i.e., Q493X for bamlanivimab and etesevimab, R346X for  
82 cilgavimab, K444X for bebtelovimab).

83

#### 84 *Mapping treatment emergent mutations to the structures of Spike:mAb complexes*

85 All three-dimensional molecular representations were generated with PyMOL 2.5.2 (Schrodinger).  
86 Deposited structures of therapeutic mAbs in complex with the Spike protein were obtained from the  
87 Protein Database (PDB) under the accession numbers 7KMG (bamlanivimab), 7C01 (etesevimab), 6XDG  
88 (casirivimab/imdevimab), 7L7E (cilgavimab), 7L7D (tixagevimab) and 6WPS (sotrovimab).

89

## 90 **Results**

91 The individual Spike amino acid mutations conferring resistance to each mAb are summarized in Table 1.  
92 A review of 31 publications reporting mAb resistance yielded a list of Spike protein mutations associated  
93 with mAb resistance (Table 2). From these publications we identified 201 out of 1060 patients who  
94 experienced emergence of resistant SARS-CoV-2 after treatment with one of the anti-Spike mAb. As  
95 expected from real-world indications and usage, the majority of these patients were  
96 immunocompromised, but immunocompetent patients were also noted (Sabin et al., 2022).

97 26 publications reported incidence rates while investigating a cohort: among them the incidences varied  
98 between 0% to 100% with overall 195/1079 or 18.1%. In particular bamlanivimab (n=5) ranged from 11  
99 to 83%, sotrovimab (n=10) from 16 to 100%, while dual mAbs (n=10) ranged from 0% to 50%.

100 The majority of resistant cases from cohorts were reported after mAb monotherapies bamlanivimab  
101 (23/160-14%) or sotrovimab (131/427-31%) as opposed to mAb cocktails bamlanivimab+ etesevimab  
102 (15/270-6%) or casirivimab+ imdevimab (16/185-9%) (Table 3). The cilgavimab+ tixagevimab essentially  
103 had a single active mAb during most of its deployment and the rate in the series cohorts was similar to  
104 single monoclonals (10/37-27%).

105 Studies with a specific mAb or mAb cocktail largely reported the same set of emerging Spike mutations  
106 (e.g., Q493X and E484X for bamlanivimab, P337X and E340X for sotrovimab).

107 By querying the Spike protein sequence database for the major mutations associated with mAb-  
108 resistance we noted that these mutations emerged in the general population across the globe shortly  
109 after marketing authorization of the mAbs to whom they confer resistance (Figure 3). The most striking  
110 examples are the emergence of S:Q493R (the single mutation conferring resistance to both  
111 bamlanivimab and etesevimab, in addition to casirivimab and regdanvimab) in Omicron BA.1 shortly  
112 after the massive deployment of bamlanivimab/etesevimab cocktail, and the emergence of S:R346X in  
113 many converging Omicron sublineages shortly after the massive deployment of cilgavimab for post-  
114 exposure prophylaxis in immunosuppressed patients. There was a single case report of bebtelovimab  
115 resistance (S:V445A post treatment in an immunocompromised patient with the B.1.23 lineage).

116

## 117 Discussion

118 The emergence of mAb treatment resistance during therapy is a common and consistent phenomenon.  
119 The discrepancy between the diversity of mutations reported *in vitro* (Table 1) and the few ones  
120 detected *in vivo* (Table 2) can be explained by various factors. First, not all mutants selected *in vitro* are  
121 fit enough to compete within the intrahost quasispecies swarm. Fitness would include the ability to bind  
122 to its cellular receptor as well capacity for virion stability and assembly. The large number of mutations  
123 shown to confer resistance *in vitro* that are not reflected in the clinical data could be rationalized by the  
124 fact that a reduction in nAb titers measured *in vitro* reflects a defect in antibody binding to Spike  
125 variants but does not report on the relative efficacy of ACE2 binding compared to the ancestral Spike.  
126 Second, in many cases some mutations were already occurring at baseline (e.g., F486X in patients  
127 treated with tixagevimab). Third, among the residues wild-type at baseline, the mutations associated  
128 with the highest fold-reduction in neutralization have been more commonly reported: while this could  
129 be a notoriety bias by the investigators (placing more attention to the mutations which have been  
130 previously reported), it is likely that as soon as one of the highly resistant mutations emerges,  
131 emergence of additional mutations do not provide any further fitness advantage.

132 No cases of treatment-emergent resistance have been reported in the medical literature after  
133 regdanvimab: this is likely due to usage much limited in time and locations across the globe.  
134 Regdanvimab is not effective against Omicron lineages, limiting its use to a few weeks in the end 2021.

135 Most anti-Spike mAbs authorized thus far were not formally investigated in randomized controlled  
136 trials (RCT) involving immunocompromised patients prior to deployment (Focosi et al., 2022a).  
137 Immunocompromised patients are at increased risk for anti-Spike mAb treatment-emergent resistance  
138 for multiple risk factors: higher basal viral load, higher likelihood of viral persistence because of  
139 inadequate immune response, and contraindications to other directly-acting antivirals (Casadevall and  
140 Focosi, 2023). Resistance monitoring is not routinely performed after outpatient mAb treatment, and  
141 viral sequencing interpretation requires paying attention to minoritarian sequences within the quasi-  
142 species swarm (Vellas et al., 2022a).

143 Despite FDA deauthorization, many US physicians continued prescription of deauthorized anti-Spike  
144 mAbs (Anderson et al., 2022), mostly based on personal beliefs in discrepancies between *in vitro* and *in*  
145 *vivo* activities. The latter phenomenon has been much amplified across Europe (Focosi and Tuccori,  
146 2022), where EMA has never withdrew a single authorized mAb to date, and only sporadically issued  
147 alerts about possible basal resistance. In addition, a plethora of uncontrolled or poorly controlled  
148 literature is advocating continued efficacy of anti-Spike mAbs based on marginal gains in surrogate  
149 endpoints in non-RCTs (Harman et al., 2022) or no change in hospitalization rates of outpatients (Patel  
150 et al., 2023). While binding affinity seems a robust surrogate endpoint, advocates of residual *in vivo*  
151 activity argue that the concentrations achieved by mAbs *in vivo* can overcome several degrees of  
152 baseline resistance to neutralization or that alternative effector function still persists (Stadler et al.,  
153 2022a; Stadler et al., 2022b; Wu et al., 2022). Both arguments do not seem robust: with IC<sub>50</sub> above 1,000  
154 (Cao et al., 2022) antigen binding by the mAb is compromised, and effector functions other than  
155 neutralization invariably require binding to the virus to activate Fc-receptors. Under the current variant  
156 soup (Focosi et al., 2023), the incompatible turnaround time of viral sequencing and therapeutics  
157 delivery, tools to predict basal efficacy of anti-Spike mAbs based on regional genomic surveillance have  
158 been developed (Focosi, 2023).

159 Of interest, several cases of mAb-treatment-emergent immune escape were rescued with COVID-19  
160 convalescent plasma (Halfmann et al., 2022; Pommeret et al., 2021), which, in contrast to mAbs, is  
161 polyclonal and thus more difficult to defeat by viral evolution.

162 We note that in many patients the emergence of mAb resistance was associated with only one amino  
163 acid substitution in the epitope, establishing the high vulnerability of monotherapy for selecting  
164 resistant variants. Emergence of resistance requires selection of mutant viruses that are fit for  
165 replication and that could explain the repeated independent isolations of variants with mutations at  
166 specific residues, such as in position 484 with bamlanivimab monotherapy. For some mAbs, the  
167 generated footprint is so unique (e.g. S:340X after sotrovimab) that baseline sequencing is not needed  
168 to confirm treatment emergence (S:340X being exceedingly rare in GISAID). The transmissibility of such  
169 mAb treatment-generated lineages remains a major concern, and it has been formally demonstrated in  
170 at least one study (Sabin et al., 2022). Clinical reports of treatment-emergent resistance in response to  
171 therapeutic mAbs reviewed here encompass nearly every epitope of the receptor binding domain (RBD),  
172 including all 3 receptor binding motif epitopes and the cross reactive S309 site (Figure 2F). Despite  
173 partial or complete overlap of antibody epitope on RBD with the ACE2 interface, these positions  
174 demonstrate remarkable mutability while maintaining receptor affinity.

175 Since therapeutic mAbs ultimately trace their ancestry to immune B cells in humans, the emergence of  
176 mAb resistance mutations poses the theoretical concern that once these occur in immunosuppressed  
177 individuals the mAb-resistant variants can spread to immunocompetent populations, bypass existing  
178 immunity, and create new waves of infection (Casadevall and Focosi, 2023). Consistent with this concern  
179 we found a temporal association between the introduction of the mAb and an increase in frequency in  
180 the SARS-CoV-2 Spike protein sequence database. Such temporal association could be explained by a  
181 scenario whereby the emergence of these variants in immunosuppressed hosts was followed by their  
182 spread among the general population. Such mutations would have created antigenically distinct viruses  
183 that could have an advantage in bypassing established immunity in the general population from  
184 vaccination and prior infection as these occur in a critical neutralizing epitope. We caution that  
185 association does not imply causation and that other interpretations are possible. For example, immunity  
186 to previous infection waves could be another possible driver for selection of novel Spike variants, and  
187 the possibility of viral transitioning through animal reservoirs remains as possibility since Q493R is a  
188 mouse-adapting mutation, which in turn suggests the possibility of reverse zoonosis. Nevertheless, the  
189 temporal association between mAb introduction in clinical practice and increased frequency of  
190 mutations conferring resistance to that mAb is concerning and suggest that future use of mAb therapies  
191 in immunocompromised populations should consider the use of cocktails and/or combination therapy  
192 with small molecule antivirals. Cocktails-of-three or more anti-Spike mAbs with non-overlapping  
193 epitopes could minimize the chances for immune escape.

194

195

196 **Figure 1.** PRISMA flowchart for study selection.

197

198 **Figure 2.** Resistance mutations on the Spike receptor binding domain (RBD) reported after treatment  
199 with authorized anti-Spike mAbs. A-D) The complex structures of RBD and corresponding therapeutic  
200 mAbs are represented as space-filling surfaces, where the RBD is colored black, the receptor binding  
201 motif (residues 438-507) is colored dark gray, and corresponding escape mutations are highlighted in  
202 yellow. In the middle panel, the entire RBD-mAb complex is depicted, and expanded and rotated views  
203 of each interface are presented in boxes on each side of the main complex. The interacting mAb is  
204 partially transparent to enable visualization of the full RBD paratope and reported resistance mutations  
205 are labeled. A) The structural complex of the bamlanivimab/etesevimab mAb cocktail with RBD is  
206 depicted. Bamlanivimab and etesevimab (PDBID 7KMG, 7C01) are colored blue and red, respectively. B)  
207 The structural complex of the casirivimab/imdevimab mAb cocktail (REGN-CoV) with RBD is depicted.  
208 Casirivimab and imdevimab (PDBID 6XDG) are colored salmon and dark green, respectively. C) The  
209 structural complex of the cilgavimab/tixagevimab mAb cocktail with RBD is depicted. Cilgavimab and  
210 tixagevimab (PDBID 7L7E, 7L7D) are colored purple and cyan, respectively. D) The structural complex of  
211 the sotrovimab mAb monotherapy with RBD is depicted. Sotrovimab (PDBID 6WPS) is colored light  
212 green. E) A summary of the reported treatment-emergent resistance mutations on RBD across all  
213 approved anti-Spike therapeutic mAbs are highlighted on the structure of RBD, shown with the front  
214 face, back face and top RBM view. Escape mutations in the RBM are highlighted in blue, non-RBM  
215 mutations are colored red. F) The complexes of the each of the mAbs in complex with RBD are depicted,  
216 colored as in panels A-D, to illustrate the relative binding angles and epitopes of each mAb.

217

218 **Figure 3.** Timeline of anti-Spike mAb authorizations and emergence of key Spike mutations associated  
219 with mAb resistance. Figure generated using Cov-Spectrum.org (Chen et al., 2021a)

**Table 1.** Spike mutations associated with mAb resistance in *in vitro* studies. Bold characters show the ones that have been detected as emerged *in vivo* after treatment with the specific mAb. In cases where the exact amino acid change has not been studied *in vitro*, only the residue is highlighted. Number within parentheses represent the median fold-reduction in neutralizing antibody titers.

| mAb          | Spike mutation                                                                                                                                                                                                                                                                                                                                                                                                                                                                                                                                                                                                                                                                                                                                                                                                                                                                                                                                                                                                                                                                                                                                                                                                                                                                                                                                                            |
|--------------|---------------------------------------------------------------------------------------------------------------------------------------------------------------------------------------------------------------------------------------------------------------------------------------------------------------------------------------------------------------------------------------------------------------------------------------------------------------------------------------------------------------------------------------------------------------------------------------------------------------------------------------------------------------------------------------------------------------------------------------------------------------------------------------------------------------------------------------------------------------------------------------------------------------------------------------------------------------------------------------------------------------------------------------------------------------------------------------------------------------------------------------------------------------------------------------------------------------------------------------------------------------------------------------------------------------------------------------------------------------------------|
| cilgavimab   | S: <b>346I</b> (> 200 (FDA, 2021)), S:444E (>200 (FDA, 2021; House et al., 2022)), S:444Q (>200 (FDA, 2021; House et al., 2022)), S: <b>444R</b> (>200 (FDA, 2021)), S:445A (36 (FDA, 2021)) , S:446S (3.7 (Ai et al., 2022; Liu et al., 2021; Tada et al., 2022a; Wang et al., 2022b; Zhou et al., 2021)), S:447R (472 (House et al., 2022)), S:450D (382 (House et al., 2022), S:450K (9 (FDA, 2021)), S: <b>452R</b> (5 (FDA, 2021; House et al., 2022; Wang et al., 2022a))                                                                                                                                                                                                                                                                                                                                                                                                                                                                                                                                                                                                                                                                                                                                                                                                                                                                                           |
| tixagevimab  | S:371F (26 (Ai et al., 2022; Iketani et al., 2022; Zhou et al., 2022), S:484A (4.9 (Ai et al., 2022; Liu et al., 2021; Tada et al., 2022a)), S:484D (7 (FDA, 2021)), S:484K (8.1 ((Annavajhala et al., 2021; Chen et al., 2021b; FDA, 2021; Wang et al., 2021b; Wang et al., 2021d), S:486S (>600 (FDA, 2021)), S:486V (135 (FDA, 2021; Wang et al., 2022a)), S:493R (6.5 (Ai et al., 2022; FDA, 2021; Liu et al., 2021)), S:990A (6.1 (FDA, 2021)), S:1009I (8.2 (FDA, 2021))                                                                                                                                                                                                                                                                                                                                                                                                                                                                                                                                                                                                                                                                                                                                                                                                                                                                                            |
| bebtelovimab | S:444N (> 1000 ), S:444Q (>140 (Westendorf et al., 2022)), S:444T (>1000 ), S:445A (>90 (Westendorf et al., 2022)), S:445F (369 ), S:445G (>730 ), S:446D (69 ), S:446R (7 ), S:446V (5.5 (Westendorf et al., 2022)), S:499H (>1000 (Westendorf et al., 2022)), S:499R (>1000 (Westendorf et al., 2022)), S:449S (45 (Westendorf et al., 2022))                                                                                                                                                                                                                                                                                                                                                                                                                                                                                                                                                                                                                                                                                                                                                                                                                                                                                                                                                                                                                           |
| sotrovimab   | S: <b>337H</b> (6 (Cathcart et al., 2021)), S: <b>337L</b> (180 (Cathcart et al., 2021)), S: <b>337R</b> (>192 (Cathcart et al., 2021)), S: <b>337T</b> (7 (Cathcart et al., 2021)), S: <b>340A</b> (>100 (Cathcart et al., 2021)), S: <b>340D</b> (12 (Cathcart et al., 2021; Gliga et al., 2022)), S: <b>340G</b> (22 (Cathcart et al., 2021)), S: <b>340K</b> (>297 (Cathcart et al., 2021; Gliga et al., 2022; Yi et al., 2021)), S: <b>340Q</b> (>50 (Cathcart et al., 2021)), S: <b>340V</b> (>200 (Cathcart et al., 2021)), S: <b>356T</b> (5.9 (Cathcart et al., 2021)), S: <b>371F</b> (13 (Ai et al., 2022; Iketani et al., 2022; Zhou et al., 2022)), S: <b>371L</b> (12 (Ai et al., 2022; Liu et al., 2021; Tada et al., 2022a; Zhou et al., 2021)), S:377K (> 704 (Cathcart et al., 2021))                                                                                                                                                                                                                                                                                                                                                                                                                                                                                                                                                                   |
| casirivimab  | S:371F (14 (Ai et al., 2022; Iketani et al., 2022; Zhou et al., 2022)), S:405N (11 (Ai et al., 2022; Iketani et al., 2022; Zhou et al., 2022)), S: <b>406D</b> (51 ), S: <b>406W</b> (84 (Starr et al., 2021)), S:417E (165 (Baum et al., 2020)), S:417R (61 (Baum et al., 2020)), S:417N (40 (Du et al., 2022; FDA, 2022; Liu et al., 2021; Tada et al., 2021a; Tada et al., 2022a; Tada et al., 2022b; Wang et al., 2021b; Wang et al., 2021c; Wang et al., 2021d)), S:417R (61 ) S:417T (7.1 (Wang et al., 2021c)), S:417V (26 (Thomson et al., 2020)), S:445T (107 ), S: <b>453F</b> (>438 (Baum et al., 2020; Hoffmann et al., 2021; Tada et al., 2021a; Wang et al., 2021a; Yao et al., 2021)), S: <b>455F</b> (4.6 (Baum et al., 2020; Copin et al., 2021)), S:475R (342 (Wang et al., 2021a)), S:484A (9 (Ai et al., 2022; Liu et al., 2021; Tada et al., 2022a)), S:484K (53 (Baum et al., 2020; Du et al., 2022; Tada et al., 2021a; Tada et al., 2021b; Tada et al., 2022b; Wang et al., 2021d; Yuan et al., 2021)), S:484Q (19 (Du et al., 2022; Tada et al., 2021b)), S:486K (> 938 (Starr et al., 2021)), S:486L (61 (Copin et al., 2021; Wang et al., 2021c)), S:486R (>10,000 (Wang et al., 2021a)), S:486S (>269 (Tada et al., 2021a)), S:486V (>439 (Copin et al., 2021; Wang et al., 2022a)), S:487R (>10,000 (Wang et al., 2021a)), S:493E (446 (FDA, |



|              |                                                                                                                                                                                                                                                                                                                                                                                                                                                                                                                                                                                                                                                                                                                              |
|--------------|------------------------------------------------------------------------------------------------------------------------------------------------------------------------------------------------------------------------------------------------------------------------------------------------------------------------------------------------------------------------------------------------------------------------------------------------------------------------------------------------------------------------------------------------------------------------------------------------------------------------------------------------------------------------------------------------------------------------------|
|              | 2022)), S:493K (>438 (Baum et al., 2020; FDA, 2022; Nabel et al., 2022; Tada et al., 2022a)), S:493R (42 (Ai et al., 2022; Du et al., 2022; Liu et al., 2021; Nabel et al., 2022))                                                                                                                                                                                                                                                                                                                                                                                                                                                                                                                                           |
| imdevimab    | S:371F (87 (Ai et al., 2022; Iketani et al., 2022; Zhou et al., 2022)), S:371L (12 (Ai et al., 2022; Liu et al., 2021; Tada et al., 2022a; Wang et al., 2022c)), S:373P (5.9 (Tada et al., 2022a)), S: <b>406W</b> (108 b (Starr et al., 2021)), S:439K (28 (FDA, 2022)), S:440K (9.9 (Wang et al., 2022c)), S:444L (153 (FDA, 2022)), S:444M (>1000 (FDA, 2022)), S:444N (>755 (FDA, 2022)), S:444Q (>857 (FDA, 2022)), S:444T (>1000 (FDA, 2022)), S:445A (548 (FDA, 2022)), S: <b>446S</b> (sw1q574 (Wang et al., 2022c)), S: <b>446V</b> (135 (FDA, 2022)), S:450D (9 (FDA, 2022)), S:498H (17 (FDA, 2022)), S:498R (3 (Ai et al., 2022)), S:499S (206 (FDA, 2022))                                                      |
| bamlanivimab | S:452R (>1000 (Wang et al., 2021a; Wang et al., 2022a)), S: <b>484A</b> (>357 (Zhou et al., 2021)), S: <b>484D</b> (>100 (FDA)), S: <b>484K</b> (>1000 (Annavaiah et al., 2021)), S: <b>484Q</b> (>100 (Gottlieb et al., 2021)), S:486R (166 (Wang et al., 2021a)), S:486V (490 (Wang et al., 2022a)), S:490L (>1000 (Wang et al., 2022a)), S:490S (>100 (Gottlieb et al., 2021)), S:493H (14 (EMA, 2021)), S:493K (>357 (Nabel et al., 2022)), S:493L (9.9 (EMA, 2021)), S: <b>493R</b> (>1000 (EMA, 2021; Nabel et al., 2022)), S: <b>494P</b> (>100 (EMA, 2021; Gottlieb et al., 2021)), S:494R (>1000 (Wang et al., 2021a))                                                                                              |
| etesevimab   | S:371F (143 (Ai et al., 2022)), S:371L (19 (Ai et al., 2022)), S:417N (>227), S:417T (>49 (Wang et al., 2021c)), S:420N (>21 (EMA, 2021)), S:456A (15 (Greaney et al., 2021)), S:456K (>33 (Greaney et al., 2021)), S:456R (>382 (Wang et al., 2021a)), S:460K (>100 (EMA, 2021)), S:460S (>100 (EMA, 2021)), S:460T (>100 (EMA, 2021)), S:460Y (>132 (EMA, 2021)), S:475R (>382 (Wang et al., 2021a)), S:475V (17 (Yi, 2020)), S:486L (7 (Wang et al., 2021c; Yi et al., 2021)), S:486R (18 (Wang et al., 2021a)), S:486V (11 (Wang et al., 2022a)), S:487R (>382 (Wang et al., 2021a)), S:493K (27 (Nabel et al., 2022)), S:493L (3.3 (EMA, 2021)), S: <b>493R</b> (44 (Ai et al., 2022; EMA, 2021; Nabel et al., 2022)),) |
| regdanvimab  | S: 452R (35 (Ryu et al., 2021)), S:484K (8.7 (Ryu et al., 2021)), S:493R (> 949 (Ai et al., 2022))                                                                                                                                                                                                                                                                                                                                                                                                                                                                                                                                                                                                                           |

**Table 2.** Published reports of anti-Spike mAb treatment-emergent resistance.

| mAb(s)                                            | N (of n) cases                                      | SARS-CoV-2 strain     | Spike mutations                           | Ref                                                                                  |
|---------------------------------------------------|-----------------------------------------------------|-----------------------|-------------------------------------------|--------------------------------------------------------------------------------------|
| bamlanivimab monotherapy (700 mg iv)              | 7 out of 101 (6.9%) immunocompetent patients        | n.a.                  | E484K/Q, S494P                            | Choudhary <i>et al</i> (Boucau <i>et al.</i> , 2022; Choudhary <i>et al.</i> , 2022) |
|                                                   | 1 immunocompromised patient                         | Alpha                 | E484K, Q493R                              | Truffot <i>et al</i> (Truffot <i>et al.</i> , 2021)                                  |
|                                                   | 1 immunocompromised patient                         | Alpha                 | E484K, Q493R, S494P                       | Lohr <i>et al</i> (Lohr <i>et al.</i> , 2021)                                        |
|                                                   | 5 out of 6 (83.3%) immunocompromised patients       | B.1                   | E484K →E484Q, reverted to E484K after CCP | Jensen <i>et al</i> (Jensen <i>et al.</i> , 2021)                                    |
|                                                   | 1 immunocompromised patient                         | Alpha                 | E484Q                                     | Bronstein <i>et al</i> (Bronstein <i>et al.</i> , 2021)                              |
|                                                   | 2 immunocompromised patients                        | 20B/20G               | E484Q/K                                   | Simons <i>et al</i> (Simons <i>et al.</i> , 2022)                                    |
|                                                   | 1 immunocompetent patient                           | B.1.311               | E484K                                     | Sabin <i>et al</i> (Sabin <i>et al.</i> , 2022)                                      |
|                                                   | 1 immunocompromised patient                         | B.1.2                 | E484T                                     | Halfmann <i>et al</i> (Halfmann <i>et al.</i> , 2022)                                |
|                                                   | 2 immunocompromised patients                        | 20A.EU2 / 20I/501Y.V1 | E484A/K                                   | Destras <i>et al</i> (Destras <i>et al.</i> , 2021)                                  |
|                                                   | 2 immunocompromised patients                        |                       | E484Q/K, Q493R                            | Scherer <i>et al</i> (Scherer <i>et al.</i> , 2022)                                  |
|                                                   | 5 out of 45 (11.1%)                                 | Alpha                 | E484A/K, Q493R, S494P                     | Gupta <i>et al</i> (Gupta <i>et al.</i> , 2023)                                      |
|                                                   | 1 out of 2 (50%) immunocompetent                    | B.1.214.2 Alpha       | Q493R                                     | Jary <i>et al</i> (Jary <i>et al.</i> , 2022)                                        |
|                                                   | 5 out of 6 (83.3%)                                  | Alpha                 | E484A/K, Q493R, S494P                     | Peiffer-Smadja <i>et al</i> (Peiffer-Smadja <i>et al.</i> , 2021)                    |
| bamlanivimab 700 mg + etesevimab 1400 mg cocktail | 1 out of 102 (1%) patients                          | B.*                   | S494P                                     | Gottlieb <i>et al</i> (Gottlieb <i>et al.</i> , 2021)                                |
|                                                   | 1 immunocompromised patient                         | Alpha                 | Q493R                                     | Focosi <i>et al</i> (Focosi <i>et al.</i> , 2021)                                    |
|                                                   | 1 immunocompromised patient                         |                       | Q493R                                     | Guigon <i>et al</i> (Guigon <i>et al.</i> , 2021)                                    |
|                                                   | 5 out of 23 (21.7%) patients (17 immunocompromised) |                       | E484K, Q493R                              | Vellas <i>et al</i> (Vellas <i>et al.</i> , 2021)                                    |
|                                                   | 3 out of 108 (2.8%)                                 |                       | E484D, Q493R/K                            | Gupta <i>et al</i> (Gupta <i>et al.</i> , 2023)                                      |
|                                                   | 1 out of 3 (33%)                                    |                       | Q493R                                     | Jary <i>et al</i> (Jary <i>et al.</i> , 2022)                                        |
|                                                   | 5 out of 34 (14.7) patients                         |                       | Q493R, E484D                              | Pommeret <i>et al</i>                                                                |

|                                                      |                                                                      |                                                  |                                    |                                                                                   |
|------------------------------------------------------|----------------------------------------------------------------------|--------------------------------------------------|------------------------------------|-----------------------------------------------------------------------------------|
|                                                      | (5 with B-cell malignancies)                                         |                                                  |                                    | (Pommeret et al., 2021)                                                           |
| casirivimab +<br>imdevimab<br>(REGN-CoV)<br>cocktail | 1 immunocompromised patient                                          | n.a.                                             | E484K/A, Y489H, Q493K and N501Y    | Choi <i>et al</i> (Choi et al., 2020)<br>Clarke <i>et al</i> (Clark et al., 2021) |
|                                                      | 0 out of 8 (0%)                                                      | Alpha (7) and Gamma (1)                          | -                                  | Jary <i>et al</i> (Jary et al., 2022)                                             |
|                                                      | 1 out of 17 (5.9%)                                                   | Alpha                                            | E406G                              | Gupta <i>et al</i> (Gupta et al., 2023)                                           |
|                                                      | 15 out of 160 (9.4%)                                                 | Delta, BA.1                                      | E406D/Q, G446S/V, Y453F, L455F/S   | Ragonnet-Cronin <i>et al</i> (Ragonnet-Cronin et al., 2022)                       |
| sotrovimab                                           | 4 cases out of 100 (4%)                                              | Delta                                            | E340K/A/V                          | Rockett <i>et al</i> (Rockett et al., 2021)                                       |
|                                                      | 10 cases out of 18 (55.6%) (15 immunocompromised)                    | BA.1 (94%)<br>BA.2 (6%)                          | E340K/A/V/D/G/Q, P337L/R/S         | Birnie <i>et al</i> (Birnie et al., 2022)                                         |
|                                                      | 3 out of 16 (18.8%) immunocompromised patients                       | 2 BA.1, 1 BA.2                                   | E340D                              | Focosi <i>et al</i> (Focosi et al., 2022b)                                        |
|                                                      | 18 out of 34 (52.9%) immunocompromised patients                      | 17 BA.1<br>1 BA.2                                | P337L/S, E340A/K/D/G, K356T, S371F | Vellas <i>et al</i> (Vellas et al., 2022b)                                        |
|                                                      | 4 of 25 (16%) BA.1-infected patients<br>2 of 7 (28.6%) BA.2-infected | BA.1<br>BA.2                                     | P337X, E340X                       | Huygens <i>et al</i> (Huygens et al., 2022)                                       |
|                                                      | 5 out of 8 (62.5%) immunocompromised                                 | BA.1 (7)<br>AY.100 (1)                           | P337L, E340D/R/K/V/Q, R346T, K356T | Andrés <i>et al</i> (Andrés et al., 2023)                                         |
|                                                      | 8 patients                                                           | BA.1                                             | P337R/S, E340A/D/K/Q               | Destras <i>et al</i> (Destras et al., 2022)                                       |
|                                                      | 9 out of 34 (26.5%)                                                  | BA.1.1.* (n=14)<br>BA.1 (n = 13)<br>BA.2 (n = 7) | E340K/D/V                          | Gupta <i>et al</i> (Gupta et al., 2023)                                           |
|                                                      | 54 out of 134 (40.3%) patients                                       | Delta, BA.1, BA.2                                | P337R/S, E340A/D/K/V, K356T        | Ragonnet-Cronin <i>et al</i> (Ragonnet-Cronin et al., 2022)                       |
|                                                      | 14 out of 43 (32.6%) patients                                        | BA.1                                             | P337S/H/L/R, E340K/D/V             | Gliga <i>et al</i> (Gliga et al., 2022)                                           |
| cilgavimab-tixagevimab                               | 9 out of 18 (50%) immunocompromised cases                            | BA.2                                             | K444R/N, R346T, L452M              | Vellas <i>et al</i> (Vellas et al., 2022a)                                        |
|                                                      | 1 out 19 (5.3%) immunocompetent cases                                | BA.4/5                                           | K444N                              | Maggi <i>et al</i> (Fabeni et al., 2023)                                          |

|              |                             |         |       |                                                                |
|--------------|-----------------------------|---------|-------|----------------------------------------------------------------|
| bebtelovimab | 1 immunocompromised patient | BA.1.23 | V445A | Gonzalez-Reiche <i>et al</i><br>(Gonzalez-Reiche et al., 2022) |
|--------------|-----------------------------|---------|-------|----------------------------------------------------------------|

**Table 3.** Frequencies of treatment-emergent resistance

| mAb (n=number of cohort series) | # of patients developing treatment-emergent resistance mutations across all case series | total # of patients across all case series | percent of patients developing treatment-emergent resistance across all case series | number of additional single case reports |
|---------------------------------|-----------------------------------------------------------------------------------------|--------------------------------------------|-------------------------------------------------------------------------------------|------------------------------------------|
| bamlanivimab (n=5)              | 23                                                                                      | 160                                        | 14.4%                                                                               | 11                                       |
| bamlanivimab+ etesevimab (n=5)  | 15                                                                                      | 270                                        | 5.6%                                                                                | 2                                        |
| casirivimab+ imdevimab (n=3)    | 16                                                                                      | 185                                        | 8.6%                                                                                | 1                                        |
| sotrovimab (n=11)               | 131                                                                                     | 427                                        | 30.7%                                                                               | 0                                        |
| cilgavimab-tixagevimab (n=2)    | 10                                                                                      | 37                                         | 27.0%                                                                               | 0                                        |
| bebtelovimab (n=0)              | n.a.                                                                                    | n.a.                                       | n.a.                                                                                | 1                                        |
| Total                           | 195                                                                                     | 1079                                       | 18.1                                                                                | 15                                       |

## References

- ETF warns that monoclonal antibodies may not be effective against emerging strains of SARS-CoV-2. Accessed online at <https://www.ema.europa.eu/en/news/etf-warns-monoclonal-antibodies-may-not-be-effective-against-emerging-strains-sars-cov-2> on January 24, 2023.
- Fact sheet for healthcare providers emergency use authorization (EUA) of sotrovimab. Accessed online at <https://www.fda.gov/media/149534/download> on February 22, 2023.
- Fact sheet for healthcare providers: emergency use authorization for bebtelovimab. Accessed online at <https://www.fda.gov/media/156152/download> on February 21, 2022.
- FDA authorizes revisions to fact sheets to address SARS-CoV-2 variants for monoclonal antibody products under emergency use authorization. Accessed online at <https://www.fda.gov/drugs/drug-safety-and-availability/fda-authorizes-revisions-fact-sheets-address-sars-cov-2-variants-monoclonal-antibody-products-under#:~:text=Today%2C%20the%20U.S.%20Food%20and,for%20the%20treatment%20of%20COVID%2D> on February 22, 2023.
- Regeneron Ireland DAC use of casirivimab and imdevimab for the treatment of COVID-19.
- J. Ai, X. Wang, X. He, X. Zhao, Y. Zhang, Y. Jiang, M. Li, Y. Cui, Y. Chen, R. Qiao, L. Li, L. Yang, Y. Li, Z. Hu, W. Zhang and P. Wang, Antibody evasion of SARS-CoV-2 Omicron BA.1, BA.1.1, BA.2, and BA.3 sub-lineages, *Cell host & microbe* **30** (2022), pp. 1077-1083.e1074.
- T.S. Anderson, A. O'Donoghue, O. Mechanic, T. Dechen and J. Stevens, Administration of Anti-SARS-CoV-2 Monoclonal Antibodies After US Food and Drug Administration Deauthorization, *JAMA Network Open* **5** (2022), pp. e2228997-e2228997.
- C. Andrés, A. González-Sánchez, M. Jiménez, E. Márquez-Algaba, M. Piñana, C. Fernández-Naval, J. Esperalba, N. Saubi, J. Quer, A. Rando-Segura, M. Miarons, M.G. Codina, I. Ruiz-Camps, T. Pumarola, P. Abrisqueta and A. Antón, Emergence of Delta and Omicron variants carrying resistance-associated mutations in immunocompromised patients undergoing sotrovimab treatment with long-term viral excretion, *Clinical Microbiology and Infection* **29** (2023), pp. 240-246.
- M.K. Annavajhala, H. Mohri, P. Wang, M. Nair, J.E. Zucker, Z. Sheng, A. Gomez-Simmonds, A.L. Kelley, M. Tagliavia, Y. Huang, T. Bedford, D.D. Ho and A.-C. Uhlemann, Emergence and expansion of SARS-CoV-2 B.1.526 after identification in New York, *Nature* **597** (2021), pp. 703-708.
- A. Baum, B.O. Fulton, E. Wloga, R. Copin, K.E. Pascal, V. Russo, S. Giordano, K. Lanza, N. Negron, M. Ni, Y. Wei, G.S. Atwal, A.J. Murphy, N. Stahl, G.D. Yancopoulos and C.A. Kyratsous, Antibody cocktail to SARS-CoV-2 spike protein prevents rapid mutational escape seen with individual antibodies, **369** (2020), pp. 1014-1018.
- E. Birnie, J.J. Biemond, B. Appelman, G.J. de Bree, M. Jonges, M.R.A. Welkers and W.J. Wiersinga, Development of Resistance-Associated Mutations After Sotrovimab Administration in High-risk Individuals Infected With the SARS-CoV-2 Omicron Variant, *Jama* **328** (2022), pp. 1104-1107.
- J. Boucau, K.W. Chew, M.C. Choudhary, R. Deo, J. Regan, J.P. Flynn, C.R. Crain, M.D. Hughes, J. Ritz, C. Moser, J.A. Dragavon, A.C. Javan, A. Nirula, P. Klekotka, A.L. Greninger, R.W. Coombs, W.A. Fischer, E.S. Daar, D.A. Wohl, J.J. Eron, J.S. Currier, D.M. Smith, J.Z. Li and A.K. Barczak, Monoclonal antibody treatment drives rapid culture conversion in SARS-CoV-2 infection, *Cell Reports Medicine* **3** (2022), p. 100678.
- Y. Bronstein, A. Adler, H. Katash, O. Halutz, H. Y and K. Levytskyi, Evolution of spike mutations following antibody treatment in two immunocompromised patients with persistent COVID-19 infection, *Journal of medical virology* (2021).
- Y. Cao, F. Jian, J. Wang, Y. Yu, W. Song, A. Yisimayi, J. Wang, R. An, N. Zhang, Y. Wang, P. Wang, L. Zhao, H. Sun, L. Yu, S. Yang, X. Niu, T. Xiao, Q. Gu, F. Shao, X. Hao, Y. Xu, R. Jin, Y. Wang and X.S. Xie, Imprinted

- SARS-CoV-2 humoral immunity induces convergent Omicron RBD evolution, *Nature* (2022), p. 2022.2009.2015.507787.
- A. Casadevall and D. Focosi, SARS-CoV-2 variants resistant to monoclonal antibodies in immunocompromised patients is a public health concern, *The Journal of clinical investigation* (2023).
- A.L. Cathcart, C. Havenar-Daughton, F.A. Lempp, D. Ma, M. Schmid, M.L. Agostini, B. Guarino, J. Di iulio, L. Rosen, H. Tucker, J. Dillen, S. Subramanian, B. Sloan, S. Bianchi, J. Wojcechowskyj, J. Zhou, H. Kaiser, A. Chase, M. Montiel-Ruiz, N. Czudnochowski, E. Cameroni, S. Ledoux, C. Colas, L. Soriaga, A. Telenti, S. Hwang, G. Snell, H.W. Virgin, D. Corti and C.M. Hebnner, The dual function monoclonal antibodies VIR-7831 and VIR-7832 demonstrate potent in vitro and in vivo activity against SARS-CoV-2, (2021), p. 2021.2003.2009.434607.
- C. Chen, S. Nadeau, M. Yared, P. Voinov, N. Xie, C. Roemer and T. Stadler, CoV-Spectrum: analysis of globally shared SARS-CoV-2 data to identify and characterize new variants, *Bioinformatics* **38** (2021a), pp. 1735-1737.
- R.E. Chen, X. Zhang, J.B. Case, E.S. Winkler, Y. Liu, L.A. VanBlargan, J. Liu, J.M. Errico, X. Xie, N. Suryadevara, P. Gilchuk, S.J. Zost, S. Tahan, L. Droit, J.S. Turner, W. Kim, A.J. Schmitz, M. Thapa, D. Wang, A.C.M. Boon, R.M. Presti, J.A. O'Halloran, A.H.J. Kim, P. Deepak, D. Pinto, D.H. Fremont, J.E. Crowe, Jr., D. Corti, H.W. Virgin, A.H. Ellebedy, P.Y. Shi and M.S. Diamond, Resistance of SARS-CoV-2 variants to neutralization by monoclonal and serum-derived polyclonal antibodies, *Nat Med* **27** (2021b), pp. 717-726.
- B. Choi, M.C. Choudhary, J. Regan, J.A. Sparks, R.F. Padera, X. Qiu, I.H. Solomon, H.-H. Kuo, J. Boucau, K. Bowman, U.D. Adhikari, M.L. Winkler, A.A. Mueller, T.Y.-T. Hsu, M. Desjardins, L.R. Baden, B.T. Chan, B.D. Walker, M. Lichterfeld, M. Brigl, D.S. Kwon, S. Kanjilal, E.T. Richardson, A.H. Jonsson, G. Alter, A.K. Barczak, W.P. Hanage, X.G. Yu, G.D. Gaiha, M.S. Seaman, M. Cernadas and J.Z. Li, Persistence and Evolution of SARS-CoV-2 in an Immunocompromised Host, **383** (2020), pp. 2291-2293.
- M.C. Choudhary, K.W. Chew, R. Deo, J.P. Flynn, J. Regan, C.R. Crain, C. Moser, M.D. Hughes, J. Ritz, R.M. Ribeiro, R. Ke, J.A. Dragavon, A.C. Javan, A. Nirula, P. Klekotka, A.L. Greninger, C.V. Fletcher, E.S. Daar, D.A. Wohl, J.J. Eron, J.S. Currier, U.M. Parikh, S.F. Sieg, A.S. Perelson, R.W. Coombs, D.M. Smith, J.Z. Li, D. Smith, A.C. Javan, M. Giganti, L. Hosey, J. Roa, N. Patel, K. Colsh, I. Rwakazina, J. Beck, S. Sieg, W. Fischer, T. Evering, R.B. Ignacio, S. Cardoso, K. Corado, P. Jagannathan, N. Jilg, S. Pillay, C. Riviere, U. Singh, B. Taiwo, J. Gottesman, M. Newell, S. Pedersen, J. Dragavon, C. Jennings, B. Greenfelder, W. Murtaugh, J. Kosmyrna, M. Gapara, A. Shahkolahi and A.-A.S.T. for the, Emergence of SARS-CoV-2 escape mutations during Bamlanivimab therapy in a phase II randomized clinical trial, *Nature Microbiology* **7** (2022), pp. 1906-1917.
- S.A. Clark, L.E. Clark, J. Pan, A. Coscia, L.G.A. McKay, S. Shankar, R.I. Johnson, V. Brusica, M.C. Choudhary, J. Regan, J.Z. Li, A. Griffiths and J. Abraham, SARS-CoV-2 evolution in an immunocompromised host reveals shared neutralization escape mechanisms, *Cell* **184** (2021), pp. 2605-2617.e2618.
- R. Copin, A. Baum, E. Wloga, K.E. Pascal, S. Giordano, B.O. Fulton, A. Zhou, N. Negron, K. Lanza, N. Chan, A. Coppola, J. Chiu, M. Ni, G.S. Atwal, A. Romero Hernandez, K. Saotome, Y. Zhou, M.C. Franklin, A.T. Hooper, S. McCarthy, S. Hamon, J.D. Hamilton, H.M. Staples, K. Alfson, R. Carrion, S. Ali, T. Norton, S. Somersan-Karakaya, S. Sivapalasingam, G.A. Herman, D.M. Weinreich, L. Lipsich, N. Stahl, A.J. Murphy, G.D. Yancopoulos and C.A. Kyratsous, The monoclonal antibody combination REGEN-COV protects against SARS-CoV-2 mutational escape in preclinical and human studies, *Cell* **184** (2021), pp. 3949-3961.
- G. Destras, S. Assaad, A. Bal, M. Bouscambert-Duchamp, V. Avrillon, B. Simon, M. Valette, J.-Y. Blay, B. Lina, E. Frobert and L. Josset, Bamlanivimab as monotherapy in two immunocompromised patients with COVID-19, *The Lancet Microbe* **2** (2021), p. e424.
- G. Destras, A. Bal, B. Simon, B. Lina and L. Josset, Sotrovimab drives SARS-CoV-2 Omicron variant evolution in immunocompromised patients, *The Lancet. Microbe* **3** (2022), p. E559.

W. Du, D.L. Hurdiss, D. Drabek, A.Z. Mykytyn, F. Kaiser, M. Gonzalez-Hernandez, D. Munoz-Santos, M.M. Lamers, R. van Haperen, W. Li, I. Drulyte, C. Wang, I. Sola, F. Armando, G. Beythien, M. Ciurkiewicz, W. Baumgartner, K. Guilfoyle, T. Smits, J. van der Lee, F.J.M. van Kuppeveld, G. van Amerongen, B.L. Haagmans, L. Enjuanes, A.D. Osterhaus, F. Grosveld and B.J. Bosch, An ACE2-blocking antibody confers broad neutralization and protection against Omicron and other SARS-CoV-2 variants, (2022), p. 2022.2002.2017.480751.

EMA, Eli Lilly and Company Limited use of bamlanivimab and etesevimab for the treatment of COVID-19, (2021).

L. Fabeni, C.E. Gruber, F. Tucci, V. Mazzotta, M. Rueca, G. Gramigna, A. Vergori, E. Giombini, O. Butera, D. Focosi, E. Nicastri, E. Girardi, F. Vaia, A. Antinori and F. Maggi, Treatment-emergent cilgavimab resistance in Omicron BA.4/5, *Drug Resistance Updates* (2023).

FDA, Fact sheet for healthcare providers: emergency use authorization for Evusheld™ (tixagevimab co-packaged with cilgavimab). Accessed online at <https://www.fda.gov/media/154701/download> on February 3, 2023, (2021).

FDA, FDA authorizes revisions to Evusheld dosing. Accessed online on April 29, 2022 at <https://www.fda.gov/drugs/drug-safety-and-availability/fda-authorizes-revisions-evusheld-dosing>, (2022).

FDA, FDA authorizes revisions to fact sheets to address SARS-CoV-2 variants for monoclonal antibody products under emergency use authorization. Accessed online at <https://www.fda.gov/drugs/drug-safety-and-availability/fda-authorizes-revisions-fact-sheets-address-sars-cov-2-variants-monoclonal-antibody-products-under> on February 27, 2023.

D. Focosi, A web tool to estimate baaseline anti-Spike monoclonal antibody efficacy based on regional genomic surveillance, *submitted* (2023).

D. Focosi, S. McConnell, A. Casadevall, E. Cappello, G. Valdiserra and M. Tuccori, Monoclonal antibody therapies against SARS-CoV-2, *The Lancet Infectious Diseases* **22** (2022a), pp. 00311-00315.

D. Focosi, F. Novazzi, A. Baj, F.D. Ferrante, S. Boutahar, A.P. Genoni, D.D. Gasperina and F. Maggi, Sotrovimab-emergent resistance in SARS-CoV-2 Omicron: A series of three cases, *J Clin Virol Plus* **2** (2022b), p. 100097.

D. Focosi, F. Novazzi, A. Genoni, F. Dentali, D. Dalla Gasperina, A. Baj and F. Maggi, Daniele Focosi, Federica Novazzi, Angelo Genoni, Francesco Dentali, Daniela Dalla gasperina, Andreina Baj, Fabrizio Maggi, (2021).

D. Focosi, R. Quiroga, S. McConnell, M.C. Johnson and A. Casadevall, Convergent evolution in SARS-CoV-2 Spike creates a variant soup from which new COVID-19 waves emerge, *International Journal of Molecular Sciences* **24** (2023), p. 2264.

D. Focosi and M. Tuccori, Prescription of Anti-Spike Monoclonal Antibodies in COVID-19 Patients with Resistant SARS-CoV-2 Variants in Italy, *Pathogens (Basel, Switzerland)* **11** (2022).

S. Gliga, N. Luebke, A. Killer, H. Gruell, A. Walker, A.T. Dilthey, C. Lohr, C. Flaßhove, H.M. Orth, T. Feldt, J.G. Bode, F. Klein, J. Timm, T. Luedde and B.O. Jensen, Rapid selection of sotrovimab escape variants in SARS-CoV-2 Omicron infected immunocompromised patients, *Clinical Infectious Diseases* (2022).

R.L. Gottlieb, A. Nirula, P. Chen, J. Boscia, B. Heller, J. Morris, G. Huhn, J. Cardona, B. Mocherla, V. Stosor, I. Shawa, P. Kumar, A.C. Adams, J. Van Naarden, K.L. Custer, M. Durante, G. Oakley, A.E. Schade, T.R. Holzer, P.J. Ebert, R.E. Higgs, N.L. Kallewaard, J. Sabo, D.R. Patel, P. Klekotka, L. Shen and D.M. Skovronsky, Effect of Bamlanivimab as Monotherapy or in Combination With Etesevimab on Viral Load in Patients With Mild to Moderate COVID-19: A Randomized Clinical Trial, *JAMA* **325** (2021), pp. 632-644.

A.J. Greaney, A.N. Loes, K.H. Crawford, T.N. Starr, K.D. Malone, H.Y. Chu and J.D. Bloom, Comprehensive mapping of mutations to the SARS-CoV-2 receptor-binding domain that affect recognition by polyclonal human serum antibodies, *bioRxiv [Preprint]* (2021).



- A. Guigon, E. Faure, C. Lemaire, M. Chopin, C. Tinez, A. Assaf, M. Lazrek, D. Hober, L. Bocket, I. Engelmann and E. Kazali Alidjinou, Emergence of Q493R mutation in SARS-CoV-2 spike protein during bamlanivimab/etesevimab treatment and resistance to viral clearance, *J Infect* **S0163-4453** (2021), pp. 00435-00437.
- A. Gupta, A. Konnova, M. Smet, M. Berkell, A. Savoldi, M. Morra, V. Van Averbek, F. De Winter, D. Peserico, E. Danese, A. Hotterbeekx, E. Righi, m.O.w. group, P. De Nardo, E. Tacconellil, S. Malhotra-Kumar and S. Kumar-Singh, Host immunological responses facilitate development of SARS-CoV-2 2 mutations in patients receiving monoclonal antibody treatments, *The Journal of clinical investigation* (2023).
- P.J. Halfmann, N.R. Minor, L.A. Haddock III, R. Maddox, G.K. Moreno, K.M. Braun, D.A. Baker, K.K. Riemersa, A. Prasad, K.J. Alman, M.C. Lambert, K. Florek, A. Bateman, R. Westergaard, N. Safdar, D.R. Andes, Y. Kawaoka, M. Fida, J.D. Yao, T.C. Friedrich and D.H. O'Connor, Evolution of a globally unique SARS-CoV-2 Spike E484T monoclonal antibody escape mutation in a persistently infected, immunocompromised individual, *Virus Evolution* (2022).
- K. Harman, S.G. Nash, H.H. Webster, N. Groves, J. Hardstaff, J. Bridgen, P.B. Blomquist, R. Hope, E. Ashano, R. Myers, S. Rokadiya, S. Hopkins, C.S. Brown, M. Chand, G. Dabrera and S. Thelwall, Comparison of the risk of hospitalisation among BA.1 and BA.2 COVID-19 cases treated with Sotrovimab in the community in England, (2022), p. 2022.2010.2021.22281171.
- M. Hoffmann, L. Zhang, N. Krüger, L. Graichen, H. Kleine-Weber, H. Hofmann-Winkler, A. Kempf, S. Nessler, J. Riggert, M.S. Winkler, S. Schulz, H.-M. Jäck and S. Pöhlmann, SARS-CoV-2 mutations acquired in mink reduce antibody-mediated neutralization, (2021), p. 2021.2002.2012.430998.
- R.V. House, T.A. Broge, T.J. Suscovich, D.M. Snow, M.T. Tomic, G. Nonet, K. Bajwa, G. Zhu, Z. Martinez, K. Hackett, C.G. Earnhart, N.M. Dorsey, S.A. Hopkins, D.S. Natour, H.D. Davis, M.S. Anderson, M.R. Gainey and R.R. Cobb, Evaluation of strategies to modify Anti-SARS-CoV-2 monoclonal antibodies for optimal functionality as therapeutics, *PloS one* **17** (2022), p. e0267796.
- S. Huygens, B.O. Munnink, A. Gharbharan, M. Koopmans and B. Rijnders, Sotrovimab resistance and viral persistence after treatment of immunocompromised patients infected with the SARS-CoV-2 Omicron variant, *Clinical Infectious Diseases* (2022).
- S. Iketani, L. Liu, Y. Guo, L. Liu, Y. Huang, M. Wang, Y. Luo, J. Yu, M.T. Yin, M.E. Sobieszczyk, Y. Huang, H.H. Wang, Z. Sheng and D.D. Ho, Antibody Evasion Properties of SARS-CoV-2 Omicron Sublineages, *Nature* **604** (2022), pp. 553-556.
- A. Jary, S. Marot, A. Faycal, S. Leon, S. Sayon, K. Zafilaza, E. Ghidaoui, S.N. Quoc, S. Nemlaghi, S. Choquet, M. Dres, V. Pourcher, V. Calvez, H. Junot, A.G. Marcelin and C. Soulié, Spike Gene Evolution and Immune Escape Mutations in Patients with Mild or Moderate Forms of COVID-19 and Treated with Monoclonal Antibodies Therapies, *Viruses* **14** (2022).
- B. Jensen, N. Luebke, T. Feldt, V. Keitel, T. Brandenburger, D. Kindgen-Milles, M. Lutterbeck, N.F. Freise, D. Schoeler, R. Haas, A. Dilthey, O. Adams, A. Walker, J. Timm and T. Luedde, Emergence of the E484K mutation in SARS-COV-2-infected immunocompromised patients treated with bamlanivimab in Germany, *The Lancet Regional Health – Europe* **8** (2021).
- L. Liu, S. Iketani, Y. Guo, J.F.-W. Chan, M. Wang, L. Liu, Y. Luo, H. Chu, Y. Huang, M.S. Nair, J. Yu, K.K.-H. Chik, T.T.-T. Yuen, C. Yoon, K.K.-W. To, H. Chen, M.T. Yin, M.E. Sobieszczyk, Y. Huang, H.H. Wang, Z. Sheng, K.-Y. Yuen and D.D. Ho, Striking Antibody Evasion Manifested by the Omicron Variant of SARS-CoV-2, (2021), p. 2021.2012.2014.472719.
- B. Lohr, D. Niemann and J. Verheyen, Bamlanivimab treatment leads to rapid selection of immune escape variant carrying E484K mutation in a B.1.1.7 infected and immunosuppressed patient, *Clinical Infectious Diseases* (2021).
- K.G. Nabel, S.A. Clark, S. Shankar, J. Pan, L.E. Clark, P. Yang, A. Coscia, L.G.A. McKay, H.H. Varnum, V. Brusic, N.V. Tolan, G. Zhou, M. Desjardins, S.E. Turbett, S. Kanjilal, A.C. Sherman, A. Dighe, R.C. LaRocque,

- E.T. Ryan, C. Tylek, J.F. Cohen-Solal, A.T. Darcy, D. Tavella, A. Clabbers, Y. Fan, A. Griffiths, I.R. Correia, J. Seagal, L.R. Baden, R.C. Charles and J. Abraham, Structural basis for continued antibody evasion by the SARS-CoV-2 receptor binding domain, **375** (2022), p. eabl6251.
- V. Patel, B. Levick, S. Boulton, D.C. Gibbons, M. Drysdale, E.J. Lloyd, M. Singh and H.J. Birch, Characteristics and Outcomes of COVID-19 Patients Presumed to be Treated with Sotrovimab in NHS Hospitals in England, (2023), p. 2023.2002.2008.23285654.
- N. Peiffer-Smadja, A. Bridier-Nahmias, V.M. Ferré, C. Charpentier, M. Garé, C. Rioux, A. Allemand, P. Lavallée, J. Ghosn, L. Kramer, D. Descamps, Y. Yazdanpanah and B. Visseaux, Emergence of E484K Mutation Following Bamlanivimab Monotherapy among High-Risk Patients Infected with the Alpha Variant of SARS-CoV-2, *Viruses* **13** (2021).
- F. Pommeret, J. Colomba, C. Bigenwald, A. Laparra, S. Bockel, A. Bayle, J.M. Michot, T. Hueso, L. Albiges, P. Tiberghien, S. Marot, A. Jary, K. Lacombe, F. Barlesi, F. Griscelli and E. Colomba, Bamlanivimab+ etesevimab therapy induces SARS-CoV-2 immune escape mutations and secondary clinical deterioration in COVID-19 patients with B-cell malignancies, *Annals of Oncology* (2021).
- M. Ragonnet-Cronin, R. Nutalai, J. Huo, A. Djokaite-Guraliuc, R. Das, A. Tuekprakhon, P. Supasa, C. Liu, M. Selvaraj, N. Groves, H. Hartman, N. Ellaby, J.M. Sutton, M.W. Bahar, D. Zhou, E. Fry, J. Ren, C. Brown, P. Klenerman, S.J. Dunachie, J. Mongkolsapaya, S. Hopkins, M. Chand, D.I. Stuart, G.R. Screaton and S. Rokadiya, Genome-first detection of emerging resistance to novel therapeutic agents for SARS-CoV-2, *bioRxiv* (2022), p. 2022.2007.2014.500063.
- R.J. Rockett, K. Basile, S. Maddocks, W. Fong, J.E. Agius, J. Johnson-Mackinnon, A. Arnott, S. Chandra, M. Gall, J.L. Draper, E. Martinez, E.M. Sim, C. Lee, C. Ngo, M. Ramsperger, A.N. Ginn, Q. Wang, M. Fennell, D. Ko, L. Lim, N. Gilroy, M.V. Sullivan, S.C.-A. Chen, J. Kok, D.E. Dwyer and V.L. Sintchenko, Resistance mutations in SARS-CoV-2 Delta variant after sotrovimab use, *N Engl J Med* **386** (2021), pp. 1477-1479.
- D.-K. Ryu, H.-M. Woo, B. Kang, H. Noh, J.-I. Kim, J.-M. Seo, C. Kim, M. Kim, J.-W. Kim, N. Kim, P. Jeon, H. Lee, J.-S. Yang, K.-C. Kim, J.-Y. Lee, M.-H. Lee, S.-S. Oh, H.-Y. Chung, K.-S. Kwon and S.-Y. Lee, The in vitro and in vivo potency of CT-P59 against Delta and its associated variants of SARS-CoV-2, (2021), p. 2021.2007.2023.453472.
- A.P. Sabin, C.S. Richmond and P.A. Kenny, Emergence and onward transmission of a SARS-CoV-2 E484K variant among household contacts of a bamlanivimab-treated patient., *Diagn Microbiol Infect Dis* **103** (2022), p. 115656.
- E.M. Scherer, A. Babiker, M.W. Adelman, B. Allman, A. Key, J.M. Kleinhenz, R.M. Langsjoen, P.-V. Nguyen, I. Onyechi, J.D. Sherman, T.W. Simon, H. Soloff, J. Tarabay, J. Varkey, A.S. Webster, D. Weiskopf, D.B. Weissman, Y. Xu, J.J. Waggoner, K. Koelle, N. Roupheal, S.M. Pouch and A. Piantadosi, SARS-CoV-2 Evolution and Immune Escape in Immunocompromised Patients, **386** (2022), pp. 2436-2438.
- L.M. Simons, E.A. Ozer, S. Gambut, T.J. Dean, L. Zhang, P. Bhimalli, J.R. Schneider, J.I. Mamede, M.G. Ison, R. Karmali, L.I. Gordon, R. Lorenzo-Redondo and J.F. Hultquist, De novo emergence of SARS-CoV-2 spike mutations in immunosuppressed patients, *Transplant infectious disease : an official journal of the Transplantation Society* **24** (2022), p. e13914.
- E. Stadler, M.T. Burgess, T.E. Schlub, K.L. Chai, Z.K. McQuilten, E.M. Wood, M.N. Polizzotto, S.J. Kent, D. Cromer, M.P. Davenport and D.S. Khoury, Monoclonal antibody levels and protection from COVID-19, (2022a), p. 2022.2011.2022.22282199.
- E. Stadler, K.L. Chai, T.E. Schlub, D. Cromer, M.N. Polizzotto, S.J. Kent, C. Beecher, H. White, T. Turner, N. Skoetz, L. Estcourt, Z.K. McQuilten, E.M. Wood, D.S. Khoury and M.P. Davenport, Determinants of passive antibody efficacy in SARS-CoV-2 infection, (2022b), p. 2022.2003.2021.22272672.
- T.N. Starr, A.J. Greaney, A. Addetia, W.W. Hannon, M.C. Choudhary, A.S. Dingens, J.Z. Li and J.D. Bloom, Prospective mapping of viral mutations that escape antibodies used to treat COVID-19, *Science* (2021), p. eabf9302.

- T. Tada, B.M. Dcosta, M.I. Samanovic, R.S. Herati, A. Cornelius, H. Zhou, A. Vaill, W. Kazmierski, M.J. Mulligan and N.R. Landau, Convalescent-Phase Sera and Vaccine-Elicited Antibodies Largely Maintain Neutralizing Titer against Global SARS-CoV-2 Variant Spikes, *mBio* **12** (2021a), p. e0069621.
- T. Tada, H. Zhou, B.M. Dcosta, M.I. Samanovic, V. Chivukula, R. Herati, S.R. Hubbard, M.J. Mulligan and N.R. Landau, Increased resistance of SARS-CoV-2 Omicron Variant to Neutralization by Vaccine-Elicited and Therapeutic Antibodies, *EBioMedicine* (2022a), p. 2021.2012.2028.474369.
- T. Tada, H. Zhou, B.M. Dcosta, M.I. Samanovic, M.J. Mulligan and N.R. Landau, Partial resistance of SARS-CoV-2 Delta variants to vaccine-elicited antibodies and convalescent sera, *iScience* (2021b).
- T. Tada, H. Zhou, M.I. Samanovic, B.M. Dcosta, A. Cornelius, R.S. Herati, M.J. Mulligan and N.R. Landau, Neutralization of SARS-CoV-2 Variants by mRNA and Adenoviral Vector Vaccine-Elicited Antibodies, *Frontiers in immunology* **13** (2022b), p. 797589.
- E.C. Thomson, L.E. Rosen, J.G. Shepherd, R. Spreafico, A. da Silva Filipe, J.A. Wojcechowskyj, C. Davis, L. Piccoli, D.J. Pascall, J. Dillen, S. Lytras, N. Czudnochowski, R. Shah, M. Meury, N. Jesudason, A. De Marco, K. Li, J. Bassi, A. O'Toole, D. Pinto, R.M. Colquhoun, K. Culap, B. Jackson, F. Zatta, A. Rambaut, S. Jaconi, V.B. Sreenu, J. Nix, R.F. Jarrett, M. Beltramello, K. Nomikou, M. Pizzuto, L. Tong, E. Cameroni, N. Johnson, A. Wickenhagen, A. Ceschi, D. Mair, P. Ferrari, K. Smollett, F. Sallusto, S. Carmichael, C. Garzoni, J. Nichols, M. Galli, J. Hughes, A. Riva, A. Ho, M.G. Semple, P.J.M. Openshaw, J.K. Baillie, S.J. Rihn, S.J. Lycett, H.W. Virgin, A. Telenti, D. Corti, D.L. Robertson and G. Snell, The circulating SARS-CoV-2 spike variant N439K maintains fitness while evading antibody-mediated immunity, (2020), p. 2020.2011.2004.355842.
- A. Truffot, J. Andreani, M. Le Marechal, A. Caporossi, O. Epaulard, P. Pognard and L. Sylvie, SARS-CoV-2 Variants in Immunocompromised Patient Given Antibody Monotherapy, *Emerging infectious diseases* **27** (2021).
- P.L. Tzou, K. Tao, J. Nouhin, S.-Y. Rhee, B.D. Hu, S. Pai, N. Parkin and R.W. Shafer, Coronavirus Antiviral Research Database (CoV-RDB): An Online Database Designed to Facilitate Comparisons between Candidate Anti-Coronavirus Compounds, **12** (2020), p. 1006.
- C. Vellas, A. Del Bello, D. Alexa, Z. Steinmeyer, L. Tribaudeau, N. Ranger, N. Jeanne, G. Martin-Blondel, P. Delobel, N. Kamar and J. Izopet, Influence of neutralizing monoclonal antibodies on the SARS-CoV-2 quasispecies in patients with COVID-19, *Clin Microb Infect* (2021).
- C. Vellas, N. Kamar and J. Izopet, Resistance mutations in SARS-CoV-2 Omicron variant after tixagevimab-cilgavimab treatment, *Journal of Infection* **85** (2022a), pp. e162-e163.
- C. Vellas, P. Trémeaux, A. Del Bello, J. Latour, N. Jeanne, N. Ranger, C. Danet, G. Martin-Blondel, P. Delobel, N. Kamar and J. Izopet, Resistance mutations in SARS-CoV-2 Omicron variant in patients treated with sotrovimab, *Clinical Microbiology and Infection* **28** (2022b), pp. 1297-1299.
- L. Wang, T. Zhou, Y. Zhang, E.S. Yang, C.A. Schramm, W. Shi, A. Pegu, O.K. Oloniniyi, A.R. Henry, S. Darko, S.R. Narpala, C. Hatcher, D.R. Martinez, Y. Tsybovsky, E. Phung, O.M. Abiona, A. Antia, E.M. Cale, L.A. Chang, M. Choe, K.S. Corbett, R.L. Davis, A.T. DiPiazza, I.J. Gordon, S.H. Hait, T. Hermanus, P. Kgagudi, F. Laboune, K. Leung, T. Liu, R.D. Mason, A.F. Nazzari, L. Novik, S. O'Connell, S. O'Dell, A.S. Olia, S.D. Schmidt, T. Stephens, C.D. Stringham, C.A. Talana, I.-T. Teng, D.A. Wagner, A.T. Widge, B. Zhang, M. Roederer, J.E. Ledgerwood, T.J. Ruckwardt, M.R. Gaudinski, P.L. Moore, N.A. Doria-Rose, R.S. Baric, B.S. Graham, A.B. McDermott, D.C. Douek, P.D. Kwong, J.R. Mascola, N.J. Sullivan and J. Misasi, Ultrapotent antibodies against diverse and highly transmissible SARS-CoV-2 variants, **373** (2021a), p. eabh1766.
- P. Wang, M.S. Nair, L. Lihong, S. Iketani, Y. Luo, Y. Guo, M. Wang, J. Yu, B. Zhang, P.D. Kwong, B.S. Graham, J.R. Mascola, J.Y. Chang, M.T. Yin, M.E. Sobieszczyk, C.A. Kyratsous, L. Shapiro, Z. Sheng, Y. Huang and D.D. Ho, Antibody resistance of SARS-CoV-2 variants B.1.351 and B.1.1.7, *Nature* **593** (2021b), pp. 130-135.

- Q. Wang, Y. Guo, S. Iketani, Z. Li, H. Mohri, M. Wang, J. Yu, A.D. Bowen, J.Y. Chan, J.G. Shah, N. Nguyen, K. Meyers, M.T. Yin, M.E. Sobieszczyk, Z. Sheng, Y. Huang, L. Liu and D. Ho, Antibody evasion by SARS-CoV-2 Omicron subvariants BA.2.12.1, BA.4 and BA.5, *Nature* **608** (2022a), pp. 603–608.
- Q. Wang, S. Iketani, Z. Li, Y. Guo, A.Y. Yeh, M. Liu, J. Yu, Z. Sheng, Y. Huang, L. Liu and D.D. Ho, Antigenic characterization of the SARS-CoV-2 Omicron subvariant BA.2.75, (2022b), p. 2022.2007.2031.502235.
- R. Wang, Q. Zhang, J. Ge, W. Ren, R. Zhang, J. Lan, B. Ju, B. Su, F. Yu, P. Chen, H. Liao, Y. Feng, X. Li, X. Shi, Z. Zhang, F. Zhang, Q. Ding, T. Zhang, X. Wang and L. Zhang, Analysis of SARS-CoV-2 variant mutations reveals neutralization escape mechanisms and the ability to use ACE2 receptors from additional species, *Immunity* **54** (2021c), pp. 1611-1621.e1615.
- Y. Wang, X. Zhang, J. Liu, Y. Wang, W. Zhan, M. Liu, M. Zhang, Q. Wang, Q. Liu, T. Zhu, Y. Wen, Z. Chen, J. Zhao, F. Wu, L. Sun and J. Huang, Combating the SARS-CoV-2 Omicron variant with non-Omicron neutralizing antibodies, (2022c), p. 2022.2001.2030.478305.
- Z. Wang, F. Schmidt, Y. Weisblum, F. Muecksch, C.O. Barnes, S. Finkin, D. Schaefer-Babajew, M. Cipolla, C. Gaebler, J.A. Lieberman, Z. Yang, M.E. Abernathy, K.E. Huey-Tubman, A. Hurley, M. Turroja, K.A. West, K. Gordon, K.G. Millard, V. Ramos, J.D. Silva, J. Xu, R.A. Colbert, R. Patel, J.P. Dizon, C. Unson-O'Brien, I. Shimeliovich, A. Gazumyan, M. Caskey, P.J. Bjorkman, R. Casellas, T. Hatziioannou, P.D. Bieniasz and M.C. Nussenzweig, mRNA vaccine-elicited antibodies to SARS-CoV-2 and circulating variants. *bioRxiv [Preprint]* (2021d), p. 2021.2001.2015.426911.
- K. Westendorf, S. Žentelis, D. Foster, P. Vaillancourt, M. Wiggin, E. Lovett, J. Hendle, A. Pustilnik, J.M. Sauder, L. Kraft, Y. Hwang, R.W. Siegel, J. Chen, B.A. Heinz, R.E. Higgs, N. Kalleward, K. Jepson, R. Goya, M.A. Smith, D.W. Collins, D. Pellacani, P. Xiang, V. de Puyraimond, M. Rivicova, L. Devorkin, C. Pritchard, A. O'Neill, C. Cohen, J. Dye, K.I. Huie, C.V. Badger, D. Kobasa, J. Audet, J.J. Freitas, S. Hassanali, I. Hughes, L. Munoz, H.C. Palma, B. Ramamurthy, R.W. Cross, T.W. Geisbert, I. Lanz, L. Anderson, P. Sipahimalani, K.S. Corbett, L. Wang, E.S. Yang, Y. Zhang, W. Shi, B.S. Graham, J.R. Mascola, T.L. Fernandez, C.L. Hansen, E. Falconer, B.E. Jones and B.C. Barnhart, LY-CoV1404 (bebtelovimab) potently neutralizes SARS-CoV-2 variants, *Cell Rep* (2022), p. 2021.2004.2030.442182.
- M.Y. Wu, E.J. Carr, R. Harvey, H.V. Mears, S. Kjaer, H. Townsley, A. Hobbs, M. Ragno, L.S. Herman, L. Adams, S. Gamblin, M. Howell, R. Beale, M. Brown, B. Williams, S. Gandhi, C. Swanton, E.C. Wall and D.L.V. Bauer, WHO's Therapeutics and COVID-19 Living Guideline on mAbs needs to be reassessed, *Lancet* **400** (2022), pp. 2193-2196.
- W. Yao, D. Ma, H. Wang, X. Tang, C. Du, H. Pan, C. Li, H. Lin, M. Farzan, J. Zhao, Y. Li and G. Zhong, Effect of SARS-CoV-2 spike mutations on animal ACE2 usage and in vitro neutralization sensitivity, (2021), p. 2021.2001.2027.428353.
- C. Yi, X. Sun, Y. Lin, C. Gu, L. Ding, X. Lu, Z. Yang, Y. Zhang, L. Ma, W. Gu, A. Qu, X. Zhou, X. Li, J. Xu, Z. Ling, Y. Xie, H. Lu and B. Sun, Comprehensive mapping of binding hot spots of SARS-CoV-2 RBD-specific neutralizing antibodies for tracking immune escape variants, *Genome Medicine* **13** (2021), p. 164.
- H. Yi, 2019 Novel Coronavirus Is Undergoing Active Recombination, *Clinical Infectious Diseases* **71** (2020), pp. 884-887.
- M. Yuan, D. Huang, C.-C.D. Lee, N.C. Wu, A.M. Jackson, X. Zhu, H. Liu, L. Peng, M.J. van Gils, R.W. Sanders, D.R. Burton, S.M. Reincke, H. Prüss, J. Kreye, D. Nemazee, A.B. Ward and I.A. Wilson, Structural and functional ramifications of antigenic drift in recent SARS-CoV-2 variants, (2021), p. 2021.2002.2016.430500.
- H. Zhou, B.M. Dcosta, N.R. Landau and T. Tada, Resistance of SARS-CoV-2 Omicron BA.1 and BA.2 Variants to Vaccine-Elicited Sera and Therapeutic Monoclonal Antibodies, *Viruses* **14** (2022).
- T. Zhou, L. Wang, J. Misasi, A. Pegu, Y. Zhang, D.R. Harris, A.S. Olia, C.A. Talana, E.S. Yang, M. Chen, M. Choe, W. Shi, I.-T. Teng, A. Creanga, C. Jenkins, K. Leung, T. Liu, E.-S.D. Stancovski, T. Stephens, B. Zhang, Y. Tsybovsky, B.S. Graham, J.R. Mascola, N.J. Sullivan and P.D. Kwong, Structural basis for potent antibody neutralization of SARS-CoV-2 variants including B.1.1.529, (2021), p. 2021.2012.2027.474307.



Identification  
Screening  
Eligibility  
Included

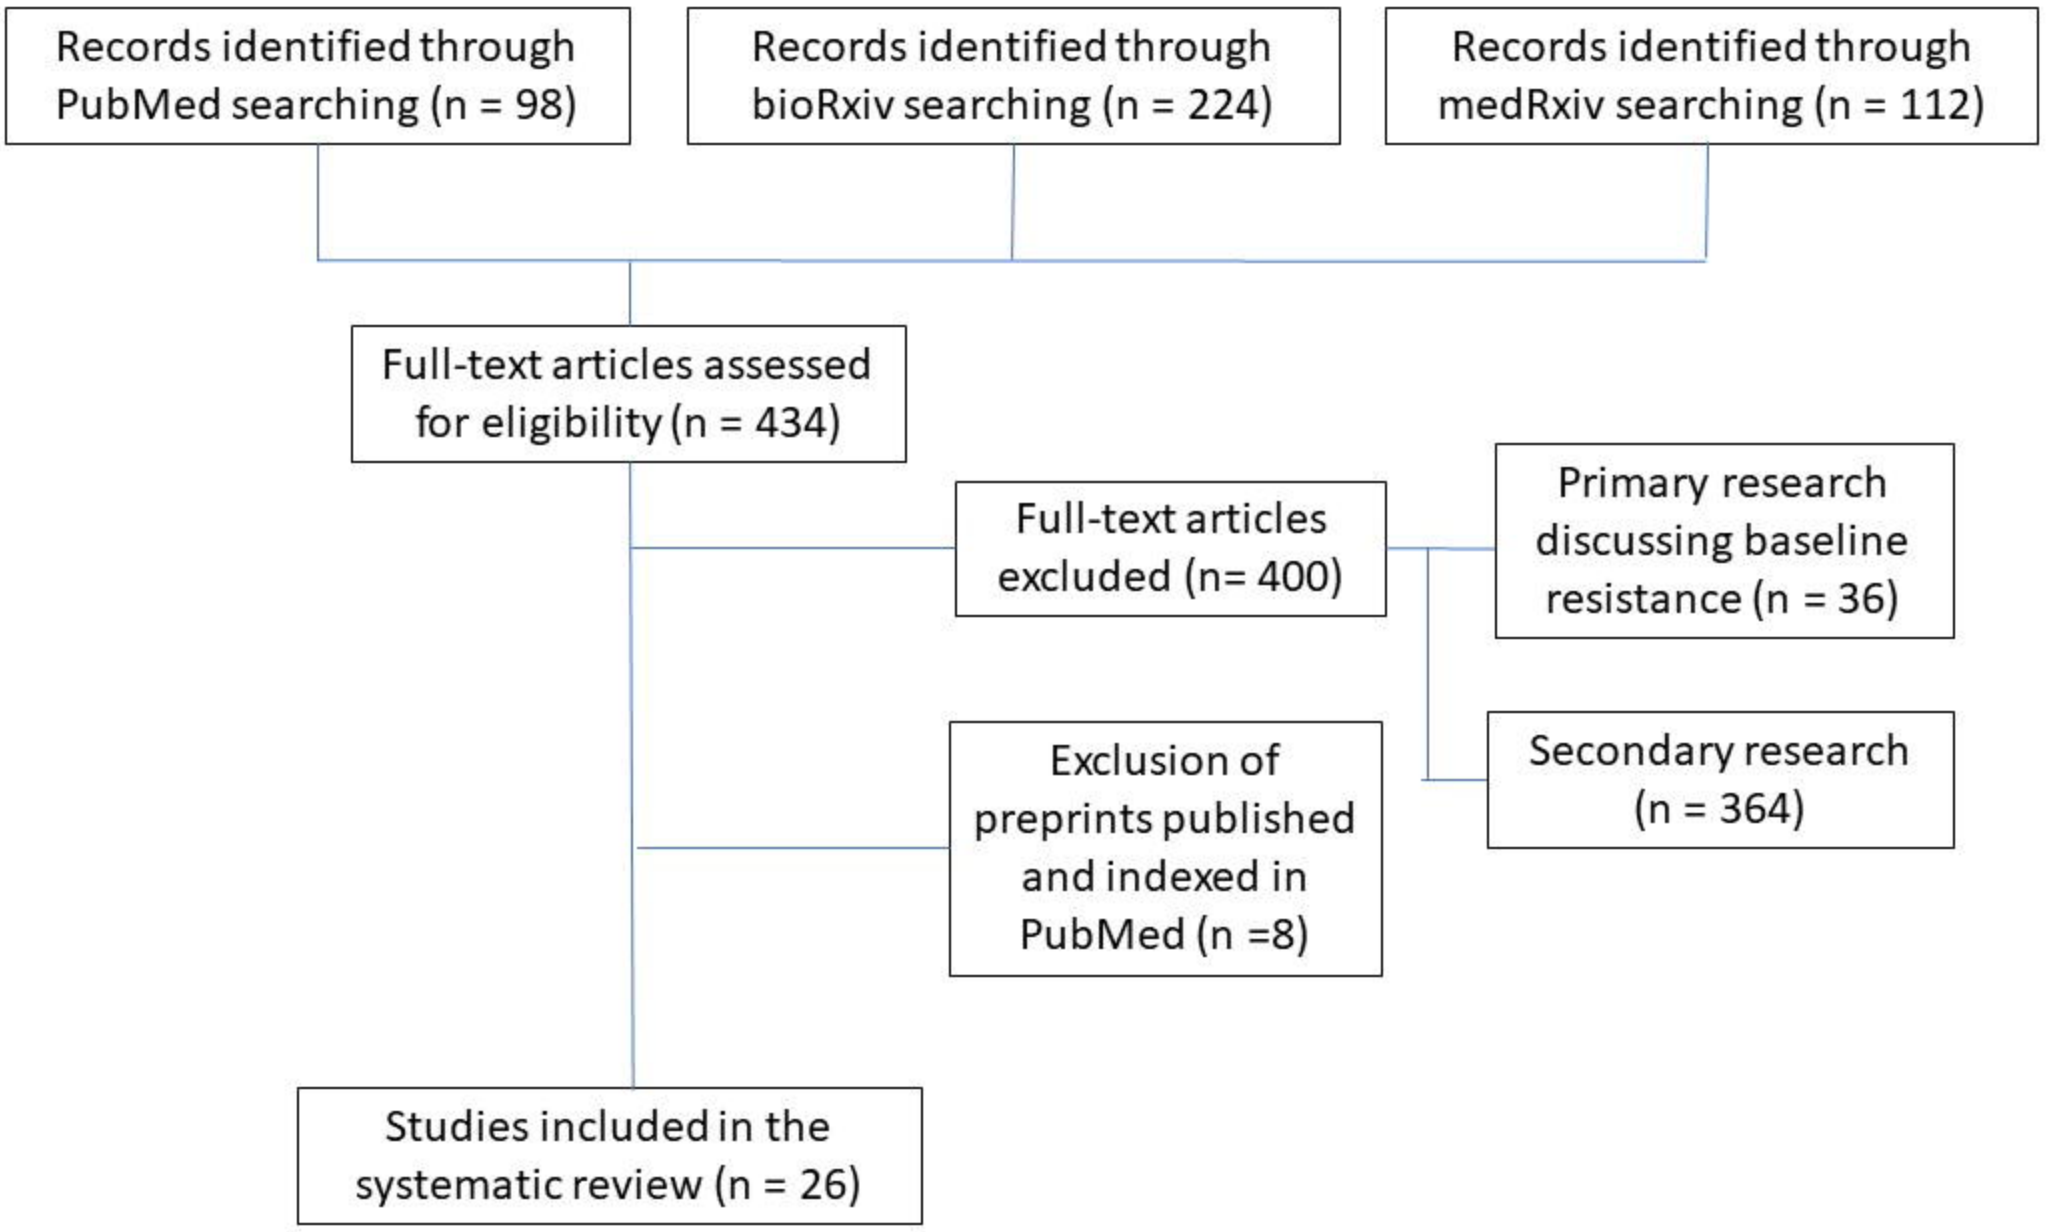

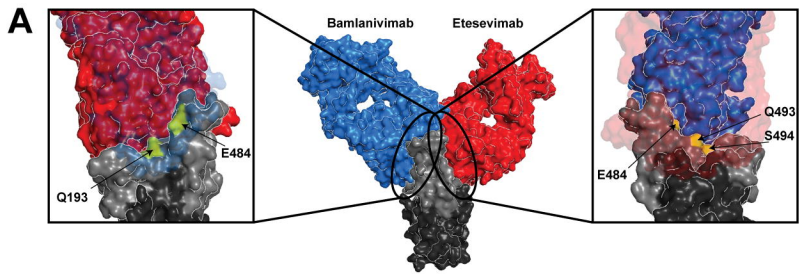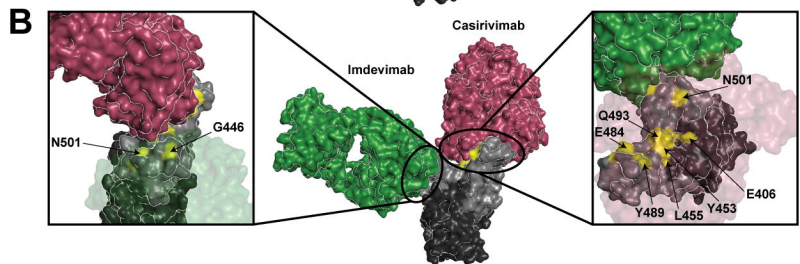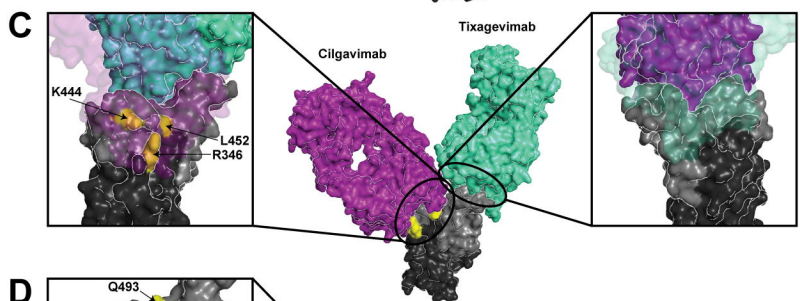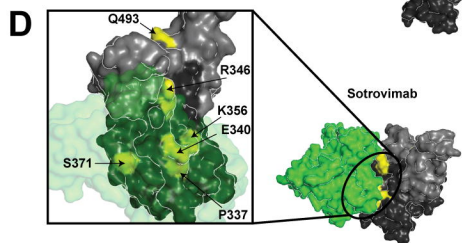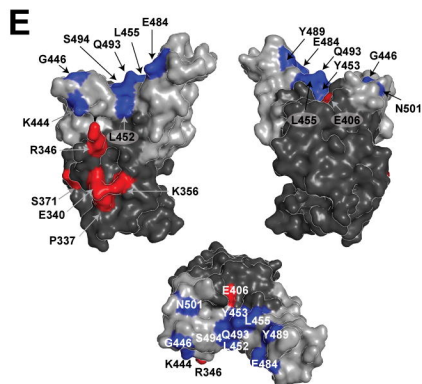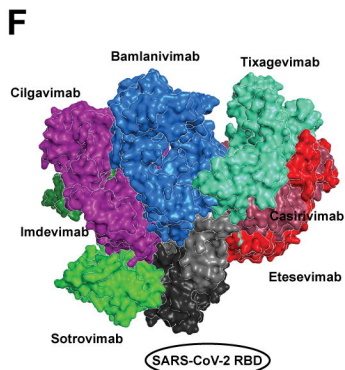

# Sequences over time in World

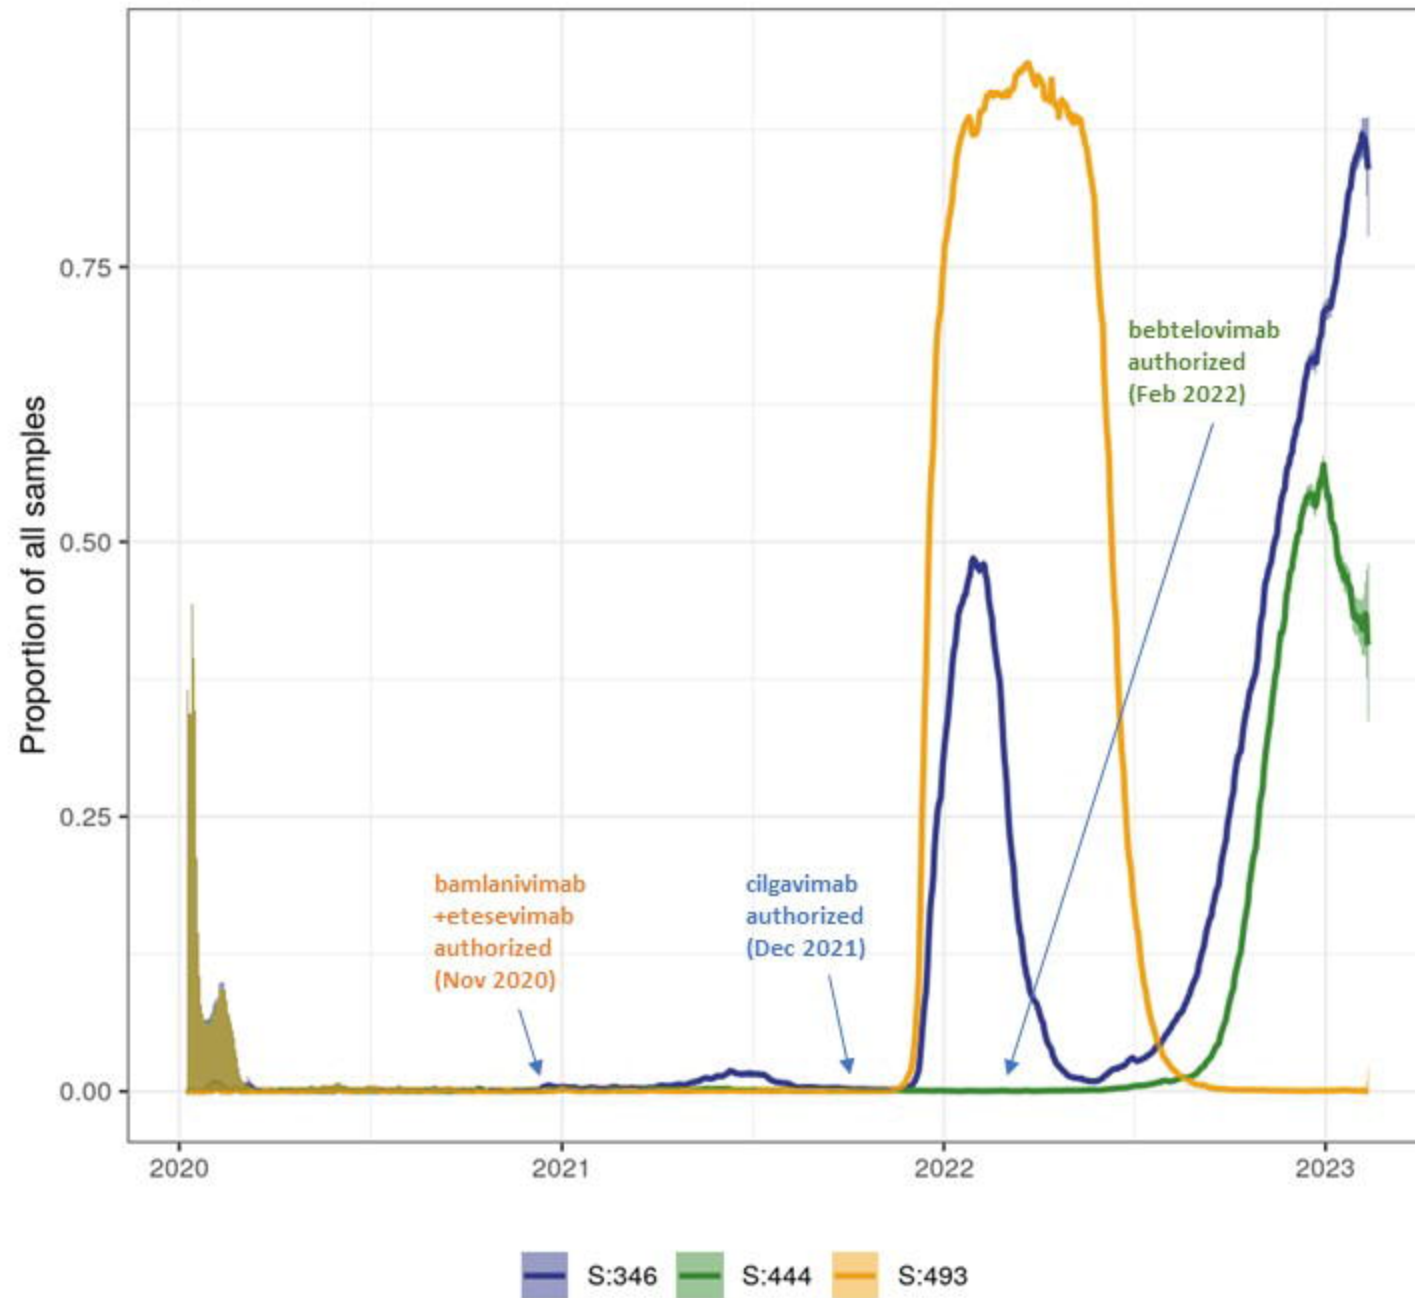

<https://cov-spectrum.org/explore/World/AllSamples/AllTimes/variants?variantQuery=S%3A346&variantQuery1=S%3A493&variantQuery2=S%3A444&analysisMode=CompareEquals&>
